# Supplementary material for: Synergistic antiviral effect of curcumin functionalized graphene oxide against respiratory syncytial virus infection
Source: Royal Society of Chemistry journal article supplement (doi:10.1039/c7nr06520e), 2017-01-01
Supplement: c7nr06520e1.pdf [file c7nr06520e1.pdf]

## Electronic Supplementary Material (ESI)

*for*

# Synergistic Antiviral Effect of Curcumin and Functionalized Graphene Oxide against Respiratory Syncytial Virus Infection

Xiao Xi Yang,<sup>a</sup> Chun Mei Li,<sup>a</sup> Yuan Fang Li,<sup>b</sup> Jian Wang<sup>a,\*</sup> and Cheng Zhi Huang<sup>a,b,\*</sup>

<sup>a</sup> *Key Laboratory on Luminescence and Real-Time Analytical Chemistry (Southwest University),  
Ministry of Education, College of Pharmaceutical Sciences, Southwest University, Chongqing  
400715, China*

<sup>b</sup> *Chongqing Key Laboratory of Biomedical Analysis (Southwest University), Chongqing Science  
& Technology Commission, College of Chemistry and Chemical Engineering, Southwest  
University, Chongqing 400715, China.*

*\*Corresponding author: wj123456@swu.edu.cn; chengzhi@swu.edu.cn*

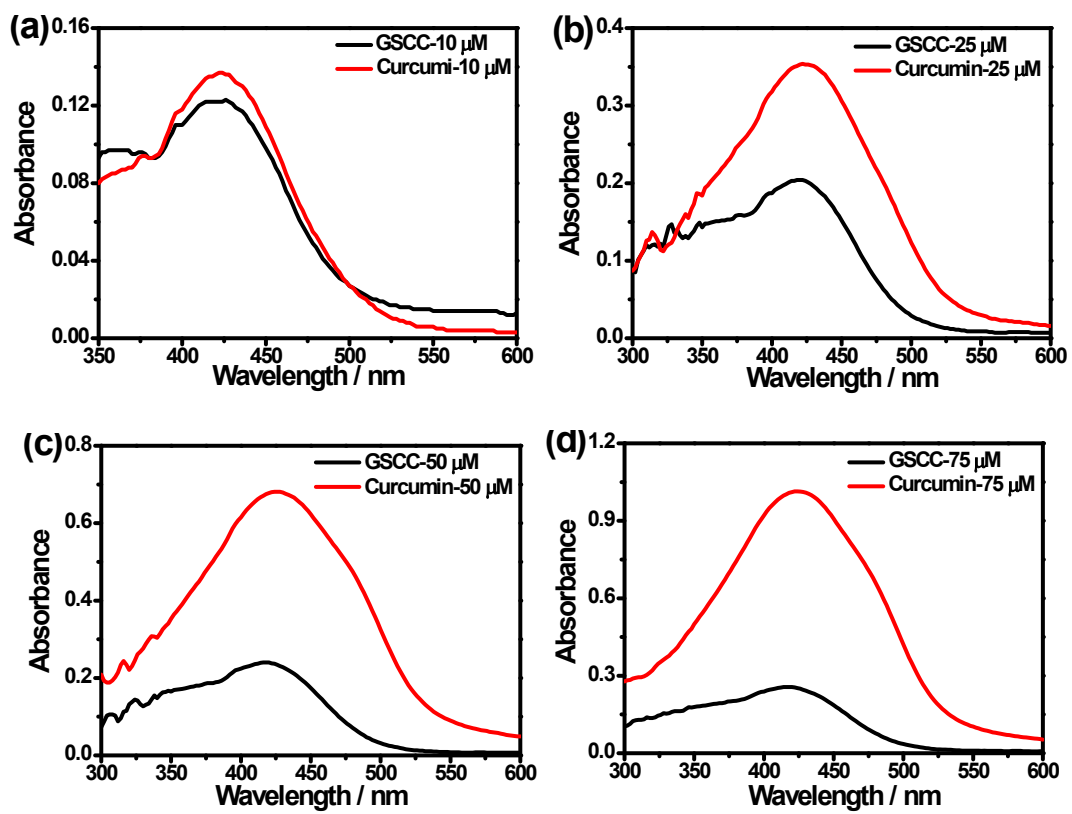

Figure S1 Loading efficiency of curcumin in GSC.

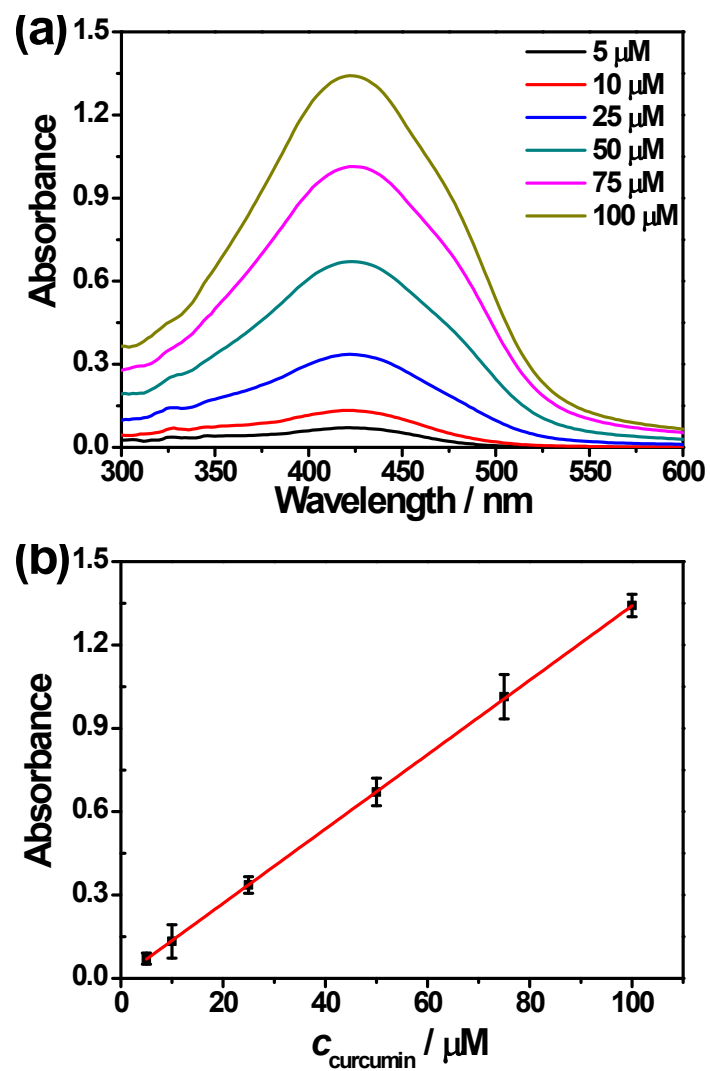

Figure S2 Calibration curve of curcumin, measured by UV/Vis spectroscopy.

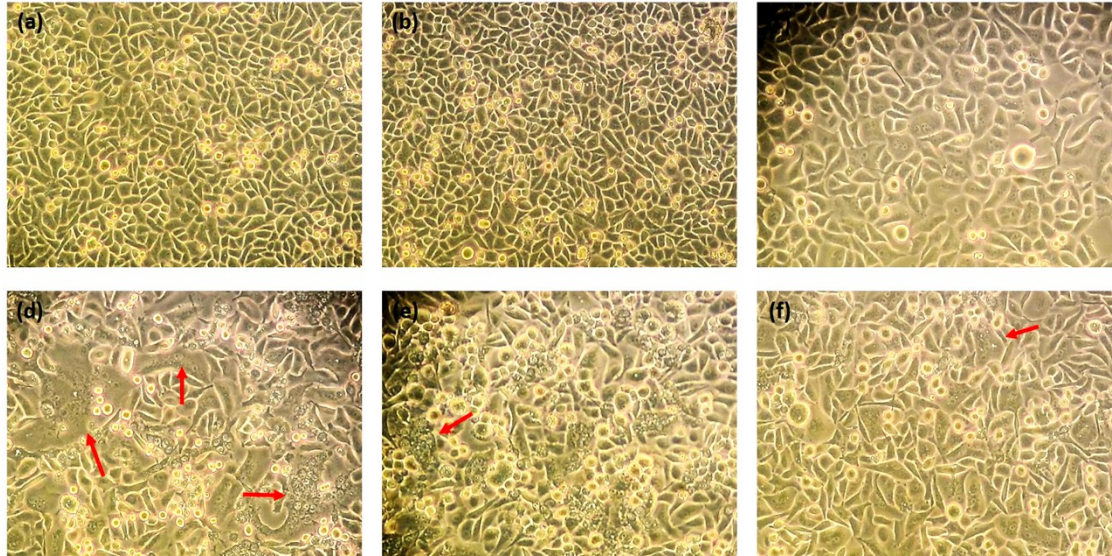

**Figure S3** The cytopathic effect (CPE) result of HEp-2 cells infected with RSV. (a), The mock HEp-2 cells; (b), HEp-2 cells incubated with GSCC; (c), HEp-2 cells incubated with curcumin; (d), HEp-2 cells infected with RSV; (e), HEp-2 cells infected with GSCC inactivating RSV (GSCC incubated with RSV for 1 h prior to infect HEp-2 cells); (f), HEp-2 cells infected with RSV, and incubated with GSCC afterwards.

**Table S1.** Elemental analysis of GO and functionalized GO

|                    | C (%) | O (%) | S (%) |
|--------------------|-------|-------|-------|
| GO                 | 56.51 | 42.41 | 1.08  |
| GO-SO <sub>3</sub> | 73.68 | 23.48 | 2.94  |

**Table S2.** DLS measurements of GO, GSC and GSCC

| Samples | Size $\pm$ SD (nm) | Zeta $\pm$ SD (mV) |
|---------|--------------------|--------------------|
| GO      | 109.6 $\pm$ 5.5    | -23.0 $\pm$ 1.5    |
| GSC     | 127.7 $\pm$ 1.6    | -19.4 $\pm$ 0.8    |
| GSCC    | 206.3 $\pm$ 2.3    | -17.7 $\pm$ 1.3    |
